# Supplementary material for: The influence of annealing conditions on the Ca/P ratio and phase transformations in bulk calcium phosphates
Source: Royal Society of Chemistry journal article supplement (doi:10.1039/d1ce01625c), 2022-01-01
Supplement: d1ce01625c1.pdf [file d1ce01625c1.pdf]

## Supplementary information

The influence of annealing conditions on Ca/P ratio and phase transformations in bulk calcium phosphates

Diana Griesiute<sup>a</sup>, Eva Raudonyte-Svirbutaviciene<sup>a,b</sup>, Aivaras Kareiva<sup>a</sup>, Aleksej Zarkov<sup>a,\*</sup>

<sup>a</sup>*Institute of Chemistry, Vilnius University, Naugarduko 24, LT-03225 Vilnius, Lithuania*

<sup>b</sup>*Institute of Geology and Geography, SRI Nature Research Centre, Akademijos Str. 2, LT-08412 Vilnius, Lithuania*

\*Author to whom correspondence should be addressed. E-mail: [aleksej.zarkov@chf.vu.lt](mailto:aleksej.zarkov@chf.vu.lt)

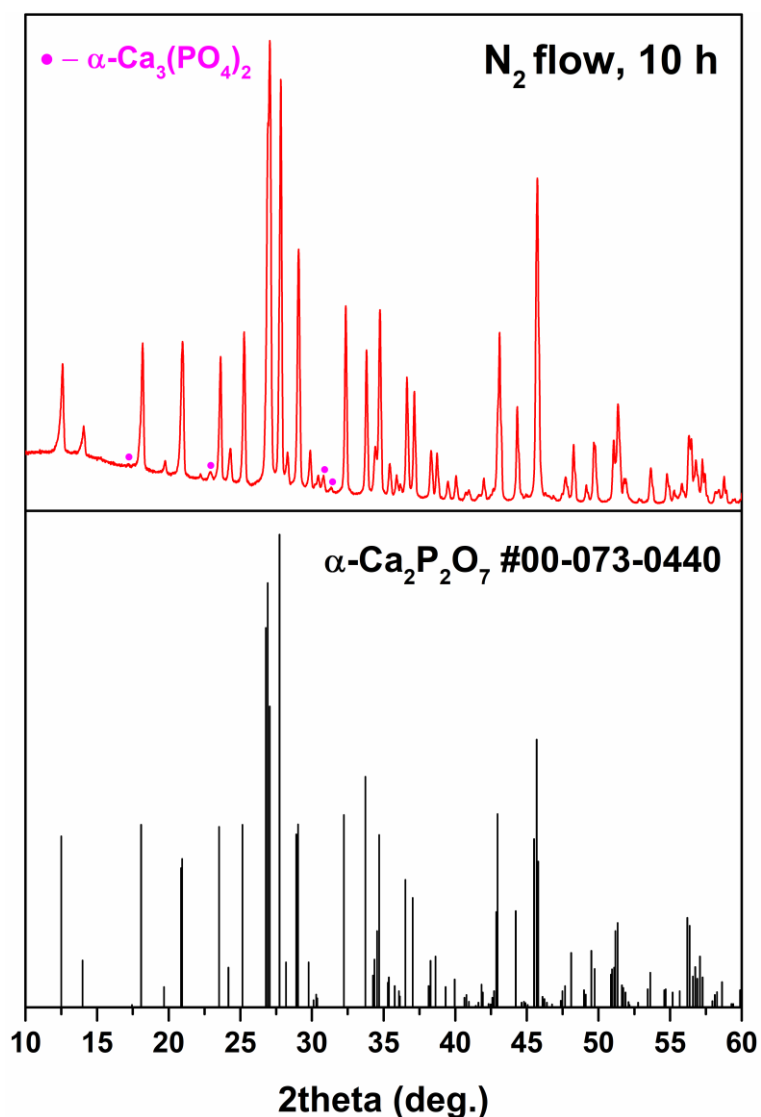

**Figure S1.** XRD patterns of DCPD powders annealed in N<sub>2</sub> flow at 1200 °C for 10 h.
